# Supplementary material for: Effects of rose hip intake on risk markers of type 2 diabetes and cardiovascular disease: a randomized, double-blind, cross-over investigation in obese persons
Source: PubMed Central journal article supplement — Eur J Clin Nutr. 2011 Dec 14;66(5):585–90. doi: 10.1038/ejcn.2011.203 (PMC3343291; doi:10.1038/ejcn.2011.203), 2011-12-14
Supplement: ejcn2011203x3.pdf [file ejcn2011203x3.pdf]

**Supplemental Table 1.** Increase ( $\Delta$ ) in plasma values of insulin, GIP and GLP 30 minutes after a standardized carbohydrate-rich breakfast meal at the start and end of the study.

|                | Control        |                |       | Rose hip       |                |       | <b>p</b>  |
|----------------|----------------|----------------|-------|----------------|----------------|-------|-----------|
|                | $\Delta$ start | $\Delta$ end   | %     | $\Delta$ start | $\Delta$ end   | %     |           |
| Insulin(mIU/L) | 65.9 $\pm$ 8.6 | 64.8 $\pm$ 6.0 | -1.7  | 65.6 $\pm$ 6.3 | 66.1 $\pm$ 6.3 | +0.8  | <b>NS</b> |
| GIP (pg/mL)    | 160 $\pm$ 14   | 179 $\pm$ 13   | +12.4 | 171 $\pm$ 12   | 185 $\pm$ 19   | +8.4  | <b>NS</b> |
| GLP (pg/mL)    | 63 $\pm$ 12    | 72 $\pm$ 16    | +15.5 | 62 $\pm$ 9     | 55 $\pm$ 13    | -10.9 | <b>NS</b> |

<sup>1</sup>Mean $\pm$ SEM, n=25.
